# Supplementary material for: A density functional theory study on the strain modulated electronic and photocatalytic properties of a GaSe monolayer for photocatalytic water splitting and artificial photosynthesis
Source: Royal Society of Chemistry journal article supplement (doi:10.1039/d2nj00956k), 2022-01-01
Supplement: d2nj00956k1.pdf [file d2nj00956k1.pdf]

**A Density functional theory study on the strain modulated electronic and photocatalytic properties of GaSe monolayer for photocatalytic water splitting and artificial photosynthesis**

Dipali Nayak, R. Thangavel\*

*Condensed Matter Physics Laboratory, Department of Physics,*

*Indian Institute of Technology (Indian School of Mines),*

*Dhanbad-826004, Jharkhand, India*

*\*rthangavel@iitism.ac.in*

Table S1. The reported summary of the calculated lattice constant and band gap values of the GaSe monolayer using different types vdW interactions.

| Sl. No. | Lattice constant(Å) | Bandgap (eV) |      | Types of structure studied | Bandgap tuning            | Applications                                        | References |
|---------|---------------------|--------------|------|----------------------------|---------------------------|-----------------------------------------------------|------------|
|         |                     | PBE          | HSE  |                            |                           |                                                     |            |
| 1.      | 3.82                | 1.83         | 2.71 | Monolayer                  | Strain                    | Device modeling                                     | [1]        |
| 2.      | 3.84                | 1.82         | 2.9  | Heterostructure            | Strain,<br>electric field | Optoelectronic<br>nanodevices                       | [2]        |
| 3.      | -                   | 2.23         | -    | Heterostructure            | -                         | Optoelectronic                                      | [3]        |
| 4.      | 3.82                | 1.91         | 2.98 | Monolayer                  | Strain                    | Water splitting                                     | [4]        |
| 5.      | 3.78                | 1.6          | -    | Heterostructure            | Strain,<br>electric field | Nanoelectronics<br>devices                          | [5]        |
| 6.      | 3.82                | -            | 2.69 | Monolayer                  | -                         | Transistors                                         | [6]        |
| 7.      | 3.82                | 2.1          | -    | Monolayer                  | -                         | Thermoelectric                                      | [7]        |
| 8.      | 3.75                | 2.21         | -    | Monolayer                  | Strain                    | Electromechanical                                   | [8]        |
| 9.      | 3.75                | 2.23         | -    | Monolayer                  | Doping                    | -                                                   | [9]        |
| 10.     | 3.82                | 1.78         | 2.64 | Heterostructure            | -                         | Solar energy<br>Harvesting                          | [10]       |
| 11.     | 3.82                | 1.77         | 2.93 | Monolayer                  | Strain                    | water splitting and<br>artificial<br>photosynthesis | This work  |

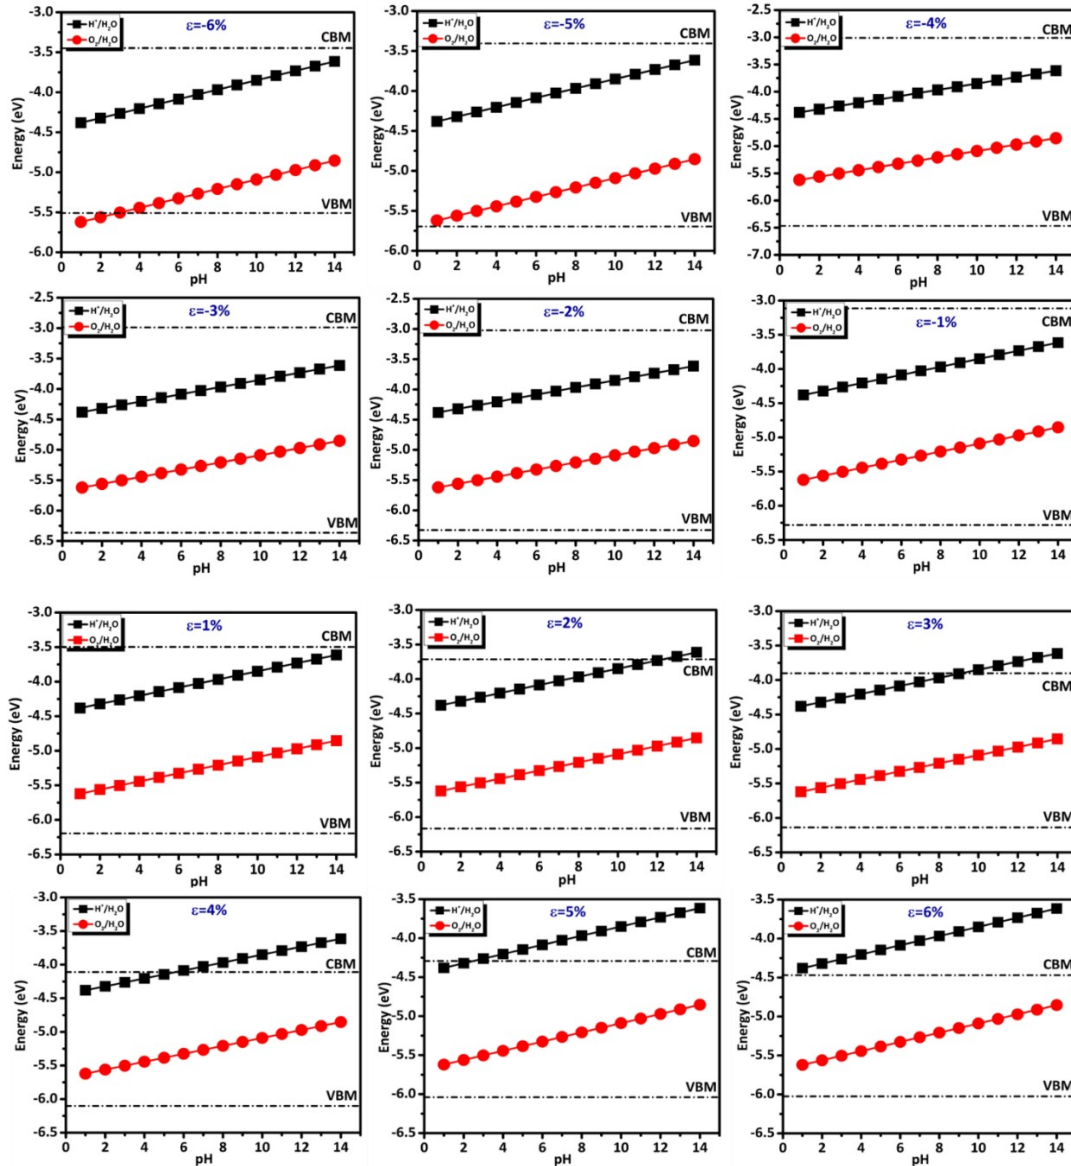

Figure S1. The effect of pH on the water redox potentials for water splitting.

## Reference

- [1] L. Huang, Z. Chen, J. Li, Effects of strain on the band gap and effective mass in two-dimensional monolayer GaX (X = S, Se, Te), *RSC Advances*. 5 (2015) 5788–5794. <https://doi.org/10.1039/c4ra12107d>.
- [2] B. Zhou, S.J. Gong, K. Jiang, L. Xu, L. Shang, J. Zhang, Z. Hu, J. Chu, A type-II GaSe/GeS heterobilayer with strain enhanced photovoltaic properties and external electric field effects, *Journal of Materials Chemistry C*. 8 (2019) 89–97. <https://doi.org/10.1039/c9tc05840k>.
- [3] H.R. Jappor, M.A. Habeeb, Tunable electronic and optical properties of GaS/GaSe van der Waals heterostructure, *Current Applied Physics*. 18 (2018) 673–680. <https://doi.org/10.1016/j.cap.2018.03.019>.

- [4] H.L. Zhuang, R.G. Hennig, Single-layer group-III monochalcogenide photocatalysts for water splitting, *Chemistry of Materials*. 25 (2013) 3232–3238. <https://doi.org/10.1021/cm401661x>.
- [5] P.T.T. Le, N.N. Hieu, L.M. Bui, H. v. Phuc, B.D. Hoi, B. Amin, C. v. Nguyen, Structural and electronic properties of a van der Waals heterostructure based on silicene and gallium selenide: Effect of strain and electric field, *Physical Chemistry Chemical Physics*. 20 (2018) 27856–27864. <https://doi.org/10.1039/c8cp05588b>.
- [6] V. Zólyomi, N.D. Drummond, V.I. Fal'Ko, Band structure and optical transitions in atomic layers of hexagonal gallium chalcogenides, *Physical Review B - Condensed Matter and Materials Physics*. 87 (2013). <https://doi.org/10.1103/PhysRevB.87.195403>.
- [7] H. Wang, G. Qin, J. Yang, Z. Qin, Y. Yao, Q. Wang, M. Hu, First-principles study of electronic, optical and thermal transport properties of group III-VI monolayer MX (M = Ga, In; X = S, Se), *Journal of Applied Physics*. 125 (2019). <https://doi.org/10.1063/1.5094663>.
- [8] M. Yagmurcukardes, R.T. Senger, F.M. Peeters, H. Sahin, Mechanical properties of monolayer GaS and GaSe crystals, *Physical Review B*. 94 (2016). <https://doi.org/10.1103/PhysRevB.94.245407>.
- [9] L. Ao, H.Y. Xiao, X. Xiang, S. Li, K.Z. Liu, H. Huang, X.T. Zu, Functionalization of a GaSe monolayer by vacancy and chemical element doping, *Physical Chemistry Chemical Physics*. 17 (2015) 10737–10748. <https://doi.org/10.1039/c5cp00397k>.
- [10] A. Rawat, R. Ahammed, Dimple, N. Jena, M.K. Mohanta, A. de Sarkar, Solar Energy Harvesting in Type II van der Waals Heterostructures of Semiconducting Group III Monochalcogenide Monolayers, *Journal of Physical Chemistry C*. 123 (2019) 12666–12675. <https://doi.org/10.1021/acs.jpcc.9b03359>.
